# Supplementary material for: Broad Impact of Exchange Protein Directly Activated by cAMP 2 (EPAC2) on Respiratory Viral Infections
Source: MDPI journal article supplement (doi:10.3390/v13061179), 2021-06-21
Supplement: s1 [file s1]

# Supplementary Materials: Broad Impact of Exchange Protein Directly Activated by cAMP 2 (EPAC2) on Respiratory Viral Infections

**Table S1.** Primers for reverse transcription and qRT-PCR.

| Primers for Reverse Transcription |         |                                                    |
|-----------------------------------|---------|----------------------------------------------------|
| Name                              |         | Sequence (5' to 3')                                |
| HMPV genome                       |         | CGTCTCAGCCAATCCCTGGTGATTATGAGTAATTAAAAAAVTGGGACAAG |
| RSV genome                        |         | CTGCGATGAGTGGCAGGCACTACAGTGTATTAGACTTRACAGCAGAAG   |
| HMPV-N                            |         | CGTCTCAGCCAATCCCTGGTTTTTTTTTTTTTAAATTACTC          |
| RSV-N                             |         | CTGCGATGAGTGGCAGGCTTTTTTTTTTTTTAACTYAAAGCTC        |
| Primers for qRT-PCR               |         |                                                    |
| Name                              |         | Sequence (5' to 3')                                |
| HMPV genome                       | Forward | GCTTCATTACCCATGAAMAGAATATC                         |
|                                   | Reverse | CGTCTCAGCCAATCCCTGG                                |
| RSV genome                        | Forward | GCATCTTCTCCATGRAATTCAGG                            |
|                                   | Reverse | CTGCGATGAGTGGCAGGC                                 |
| HMPV-N                            | Forward | CACAGARCTATTTTCWGCAGCAG                            |
|                                   | Reverse | CGTCTCAGCCAATCCCTGG                                |
| RSV-N                             | Forward | ACTACAGTGTATTAGACTTRACAGCAGAAG                     |
|                                   | Reverse | CTGCGATGAGTGGCAGGC                                 |
| AdV-DBP                           | Forward | GCCATTGCGCCCAAGAAGAA                               |
|                                   | Reverse | CTGTCCACGATTACCTCTGGTGAT                           |
| IP-10                             | Forward | GTGGCATTCAAGGAGTACCTC                              |
|                                   | Reverse | GCCTTCGATTCTGGATTCAGACA                            |
| RANTES                            | Forward | CCTGCTGCTTTGCCTACATTGC                             |
|                                   | Reverse | ACACACTTGGCGGTTCTTTCGG                             |
| 18S                               | Forward | ACATCCAAGGAAGGCAGCAG                               |
|                                   | Reverse | TCGTCACTACCTCCCCGG                                 |
| GAPDH                             | Forward | CTCAAGATCATCAGCAATGCCT                             |
|                                   | Reverse | AAGTTGTCATGGATGACCTTGG                             |
